# Supplementary material
Source: PubMed Central journal article supplement (PMC7819762)
Supplement: bloodBLD2020005505-suppl2.pdf [file bloodBLD2020005505-suppl2.pdf]

**Supplemental Table 1:** Nuclear proteins upregulated in BAL of GCSF-/- mice compared to wildtype after acid injury

| <b>Protein Family</b>             | <b>Protein</b>                                                              | <b>Function</b>                                                                                                                                          |
|-----------------------------------|-----------------------------------------------------------------------------|----------------------------------------------------------------------------------------------------------------------------------------------------------|
| <b>Histones</b>                   | Histone H4<br>H2afy<br>H2afx<br>H2afv<br>Hist1h2af<br>Hist1h2bp<br>Hist1h1b |                                                                                                                                                          |
| <b>Histone Modifiers</b>          | Supt6h<br>Dot1l<br><br>Nap1l1<br>Nap1l4<br>Uty                              | Histone chaperone<br>Histone lysine<br>methyltransferase<br>Chromatin nucleosome<br>Chromatin nucleosome<br>Histone demethylase                          |
| <b>Chromatin-Binding Proteins</b> | Atad2b<br>Nipbl                                                             | Chromatin-associated ATPase<br>Chromatin adhesion and<br>condensation                                                                                    |
| <b>Transcription Factors</b>      | Ubtfl1<br>Camta2<br>Asx3<br>Rhox12                                          | Binds DNA<br>Transcription factor<br>Transcriptional regulator<br>Homeobox transcription<br>factor                                                       |
| <b>Nuclear Structure</b>          | Syne2<br><br>Hnrnpu<br>Myp<br>Srrm1<br>Spire2                               | Actin-binding nuclear<br>membrane protein<br>Ribonucleoprotein complex<br>Ribonucleoprotein complex<br>Nuclear Matrix Protein<br>Nuclear Actin Filaments |
| <b>Other Nuclear Proteins</b>     | Ppm1e<br>Hnrnpa1<br>Dnah11<br>Ik                                            | Nuclear phosphatase<br>Alternative splicing (nuclear)<br>Sister chromatid segregation<br>Unknown function but binds<br>in nucleus                        |

### Supplemental Figure 1

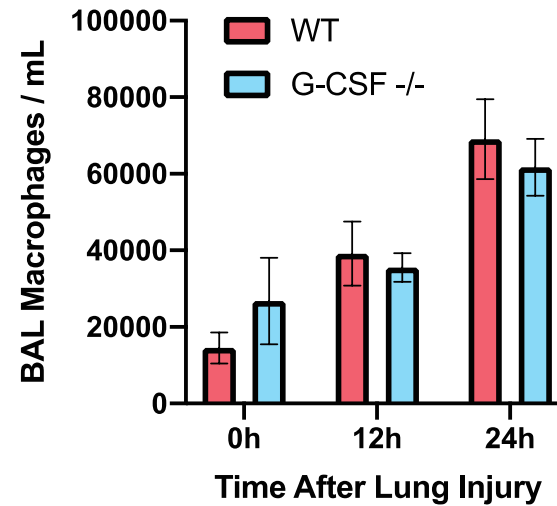

**Supplemental Figure 1:** BAL macrophages are quantified in C57BL/6 and G-CSF<sup>-/-</sup> mice at baseline, 12 hours and 24 hours after lung injury. There were no significant changes in BAL macrophage numbers between C57BL/6 and G-CSF<sup>-/-</sup> mice prior to or after lung injury.

## Supplemental Figure 2

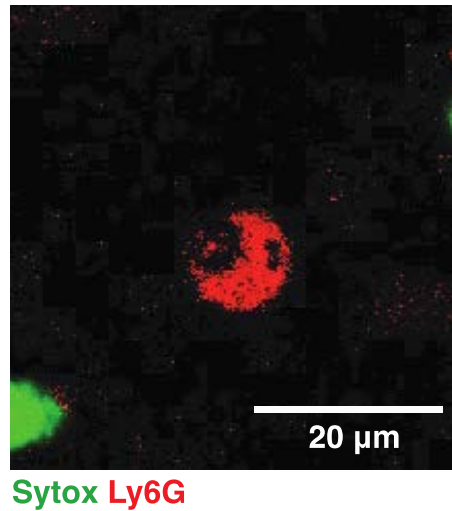

**Supplemental Figure 2:** MyD88<sup>-/-</sup> neutrophils were incubated with Sytox-stained salmon sperm DNA. A representative image is shown indicating that MyD88<sup>-/-</sup> neutrophils do not engulf nuclei. Neutrophils (red) are stained with anti-Ly6G antibody and Sytox-labeled DNA (green).

**Video 1. Neutrophils engulfing extracellular DNA.** Isolated neutrophils underwent phorbol 12-myristate 13-acetate (100ng/ml)-induced NET formation on fibronectin coated microfluidic channels. Extracellular DNA was labeled with SYTOX Orange. The following day, isolated neutrophils were labeled with calcein AM and infused through the NET-lined channels. Representative video depicts an intact human neutrophil (green) phagocytosing NET cfDNA (red) 20x magnification over 4 hours.
